# Supplementary material for: Impact of holding the baby following stillbirth on maternal mental health and well-being: findings from a national survey
Source: PubMed Central journal article supplement — BMJ Open. 2016 Aug 18;6(8):e010996. doi: 10.1136/bmjopen-2015-010996 (PMC5013511; doi:10.1136/bmjopen-2015-010996), 2016-08-18
Supplement: bmjopen-2015-010996supp_tables.pdf [file bmjopen-2015-010996supp_tables.pdf]

## Supplementary Materials.

**Table A. Mental health and wellbeing 9 months after the birth by current pregnancy status**

|                                        | Held (%)  | Did not hold (%) | OR (95%CI)         | OR <sub>adj</sub> (95%CI) |
|----------------------------------------|-----------|------------------|--------------------|---------------------------|
| <b>Currently Pregnant (188)</b>        |           |                  |                    |                           |
| Depression                             | 19.5 (32) | 4.2 (1)          | 5.16 (0.67-39.78)  | 5.00 (0.65-38.74)         |
| Anxiety                                | 29.9 (49) | 20.8 (5)         | 1.62 (0.57-4.61)   | 1.58 (0.55-4.52)          |
| Poor physical health                   | 3.0 (5)   | 8.3 (2)          | 0.57 (0.06-5.35)   | 0.27 (0.02-3.19)          |
| PTSD symptoms                          | 36.0 (59) | 12.5 (3)         | 3.76* (1.07-13.21) | 3.75* (1.07-13.20)        |
| Relationship difficulties with partner | 3.7 (6)   | 0.0 (0)          | ‡                  | ‡                         |
| Relationship difficulties with family  | 7.9 (13)  | 0.0 (0)          | ‡                  | ‡                         |
| <b>Not Pregnant (270)</b>              |           |                  |                    |                           |
| Depression                             | 30.2 (67) | 22.9 (11)        | 1.41 (0.68-2.95)   | 1.25 (0.58-2.69)          |
| Anxiety                                | 35.1 (78) | 16.7 (8)         | 2.65* (1.18-5.96)  | 2.26 (0.98-5.21)          |
| Poor physical health                   | 5.4 (12)  | 6.2 (3)          | 0.84 (0.23-3.09)   | 0.93 (0.23-3.74)          |
| PTSD symptoms                          | 40.1 (89) | 29.2 (14)        | 1.58 (0.79-3.12)   | 1.19 (0.58-2.47)          |
| Relationship difficulties with partner | 11.7 (26) | 12.5 (6)         | 0.90 (0.35-2.34)   | 0.80 (0.30-2.17)          |
| Relationship difficulties with family  | 17.6 (39) | 4.2 (2)          | 4.79*(1.12-20.61)  | 3.68 (0.84-16.12)         |

OR<sub>adj</sub>: with adjustment for multiple pregnancy, ethnicity and fertility treatment

‡ Group sizes insufficient for analysis, \*p<.05, \*\*p<.01, \*\*\*p<.001

**Table B. Mental health and wellbeing 9 months after the birth by condition of the baby (time between antepartum death and delivery, gestation of stillbirth, and presence of a congenital anomaly)**

|                                                   | Held %<br>(n) | Did not hold<br>% (n) | OR<br>(95%CI)      | OR <sub>adj</sub><br>(95%CI) | Held %<br>(n)                                         | Did not hold<br>% (n) | OR<br>(95%CI)      | OR <sub>adj</sub><br>(95%CI) |
|---------------------------------------------------|---------------|-----------------------|--------------------|------------------------------|-------------------------------------------------------|-----------------------|--------------------|------------------------------|
| <b>Time between antepartum death and delivery</b> |               |                       |                    |                              | <b>A few hours before or during delivery (n = 97)</b> |                       |                    |                              |
| <b>Up to the day before (or unsure) (n = 357)</b> |               |                       |                    |                              |                                                       |                       |                    |                              |
| Depression                                        | 24.3 (71)     | 16.9 (11)             | 1.52 (0.75-3.07)   | 1.49 (0.73-3.04)             | 30.4 (28)                                             | 0 (0)                 | ‡                  | ‡                            |
| Anxiety                                           | 30.8 (90)     | 16.9 (11)             | 2.19* (1.09-4.40)  | 2.04* (1.01-4.13)            | 40.2 (55)                                             | 40.0 (2)              | 1.03 (0.16-6.46)   | 1.08 (1.52-7.69)             |
| PTSD symptoms                                     | 36.3 (106)    | 21.5 (14)             | 2.02* (1.07-3.84)  | 1.76 (0.91-3.39)             | 45.7 (42)                                             | 20.0 (1)              | ‡                  | ‡                            |
| Poor physical health                              | 4.1 (12)      | 6.2 (4)               | 0.81 (0.22-2.98)   | 0.93 (0.24-3.64)             | 5.4 (5)                                               | 0 (0)                 | ‡                  | ‡                            |
| Relationship difficulties<br>with partner         | 8.6 (25)      | 7.7 (5)               | 1.12 (0.41-3.05)   | 1.07 (0.39-2.94)             | 10.9 (10)                                             | 20.0 (1)              | ‡                  | ‡                            |
| Relationship difficulties<br>with family          | 14.4 (42)     | 1.5 (1)               | ‡                  | ‡                            | 14.1 (13)                                             | 20.0 (1)              | ‡                  | ‡                            |
| <b>Gestation of stillbirth</b>                    |               |                       |                    |                              | <b>33 weeks' + (n = 289)</b>                          |                       |                    |                              |
| <b>&lt; 33 weeks gestation (n = 165)</b>          |               |                       |                    |                              |                                                       |                       |                    |                              |
| Depression                                        | 22.6 (31)     | 7.1 (2)               | 3.82 (0.86-17.05)  | 5.21* (1.07-25.28)           | 27.9 (69)                                             | 23.8 (10)             | 1.19 (0.55-2.56)   | 1.08 (0.49-2.38)             |
| Anxiety                                           | 29.9 (41)     | 7.1 (2)               | 5.86* (1.33-25.85) | 7.52* (1.61-35.17)           | 35.2 (87)                                             | 26.2 (11)             | 1.50 (0.72-3.14)   | 1.31 (0.61-2.80)             |
| PTSD symptoms                                     | 31.4 (43)     | 21.4 (6)              | 1.71 (0.65-4.53)   | 1.75 (0.64-4.78)             | 42.9 (106)                                            | 26.2 (11)             | 2.05 (0.98-4.27)   | 1.69 (0.79-3.62)             |
| Poor physical health                              | 5.8 (8)       | 7.1 (2)               | 0.84 (0.17-4.18)   | 1.46 (0.25-8.65)             | 3.6 (3)                                               | 7.1 (9)               | 0.66 (0.14-3.22)   | 0.69 (0.13-3.60)             |
| Relationship difficulties<br>with partner         | 5.8 (8)       | 3.6 (1)               | 1.74 (0.21-14.51)  | 1.50 (0.17-13.04)            | 10.9 (27)                                             | 11.9 (5)              | 0.89 (0.32-2.47)   | 0.75 (0.27-2.12)             |
| Relationship difficulties<br>with family          | 13.9 (19)     | 0 (0)                 | ‡                  | ‡                            | 14.6 (36)                                             | 4.8 (2)               | 3.36 (0.78-14.53)  | 3.00 (0.69-13.16)            |
| <b>Congenital Anomaly</b>                         |               |                       |                    |                              | <b>No congenital anomaly (n = 392)</b>                |                       |                    |                              |
| <b>Congenital Anomaly (n = 59)</b>                |               |                       |                    |                              |                                                       |                       |                    |                              |
| Depression                                        | 29.2 (14)     | 18.2 (2)              | 1.63 (0.30-8.70)   | 1.60 (0.26-10.02)            | 24.8 (82)                                             | 16.4 (10)             | 1.65 (0.80-3.41)   | 1.51 (0.72-3.15)             |
| Anxiety                                           | 27.1 (13)     | 18.2 (2)              | 1.63 (0.30-8.70)   | 1.32 (0.23-7.72)             | 32.9 (109)                                            | 18.0 (11)             | 2.20* (1.10-4.41)  | 2.03* (1.01-4.12)            |
| PTSD symptoms                                     | 31.3 (15)     | 18.2 (2)              | 1.81 (0.34-9.63)   | 1.94 (0.34-11.10)            | 38.7 (128)                                            | 24.6 (15)             | 1.91* (1.02-3.57)  | 1.67 (0.88-3.17)             |
| Poor physical health                              | 2.1 (1)       | 0(0)                  | ‡                  | ‡                            | 3.9 (13)                                              | 8.2 (5)               | 0.57 (0.18-1.82)   | 0.62 (0.19-2.07)             |
| Relationship difficulties<br>with partner         | 4.2 (2)       | 18.2 (2)              | 0.19 (0.02-1.52)   | 0.11 (0.01-1.07)             | 10.0 (33)                                             | 6.6 (4)               | 1.55 (0.53-4.56)   | 1.48 (0.50-4.44)             |
| Relationship difficulties<br>with family          | 10.4 (5)      | 0 (0)                 | ‡                  | ‡                            | 14.5 (48)                                             | 3.3 (2)               | 4.94* (1.17-20.91) | 4.64* (1.09-19.84)           |

OR<sub>adj</sub>: with adjustment for multiple pregnancy, ethnicity and fertility treatment ‡ Group sizes insufficient for analysis, \*p<.05, \*\*p<.01, \*\*\*p<.001
